# Supplementary material for: Electrochemical interface based on polydopamine and gold nanoparticles/reduced graphene oxide for impedimetric detection of lung cancer cells
Source: Royal Society of Chemistry journal article supplement (doi:10.1039/d3ra00793f), 2023-01-01
Supplement: d3ra00793f1.pdf [file d3ra00793f1.pdf]

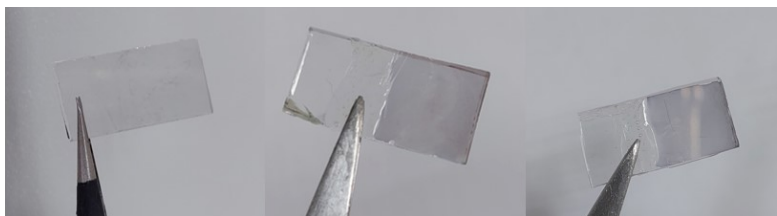

33

34

**Figure 1S.** Photos of rGO/FTO electrode, AuNPs/rGO/FTO electrode, and

35

PDA/AuNPs/rGO/FTO electrode (from left to right).

36

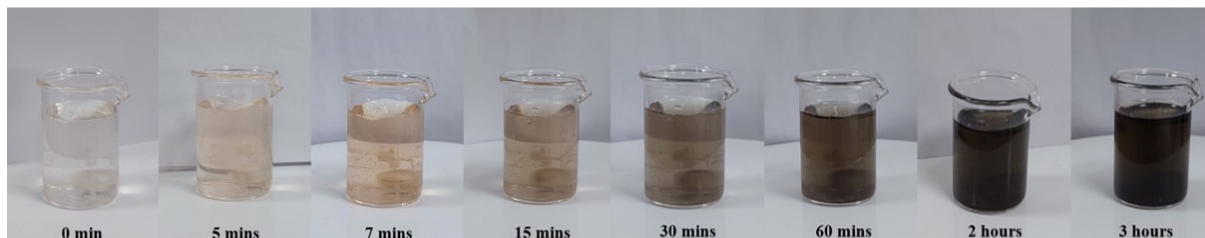

37

38

**Figure 2S.** The change in solution color during oxidation of dopamine in Tris (pH 8.5).

39

40

41

42

43

44

45

46

47

48

49

50

51

52

53

54

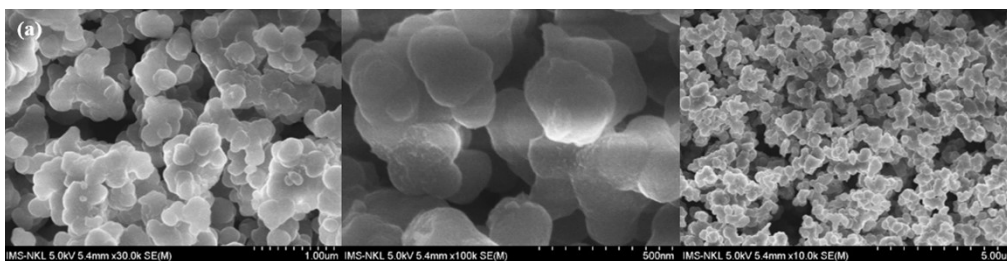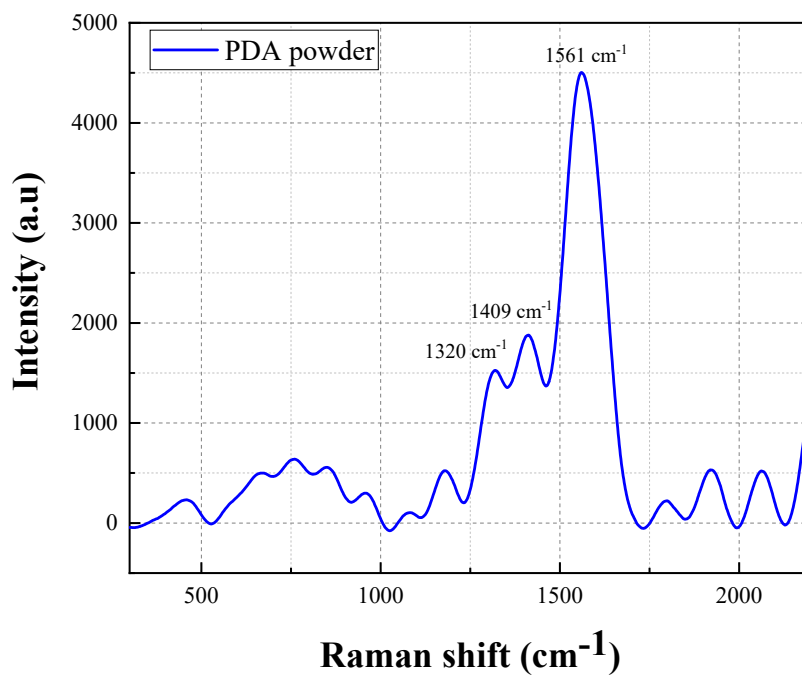

55

56

57

58

59

60

61

**Figure 3S.** Morphology and structural behaviors of PDA powder.

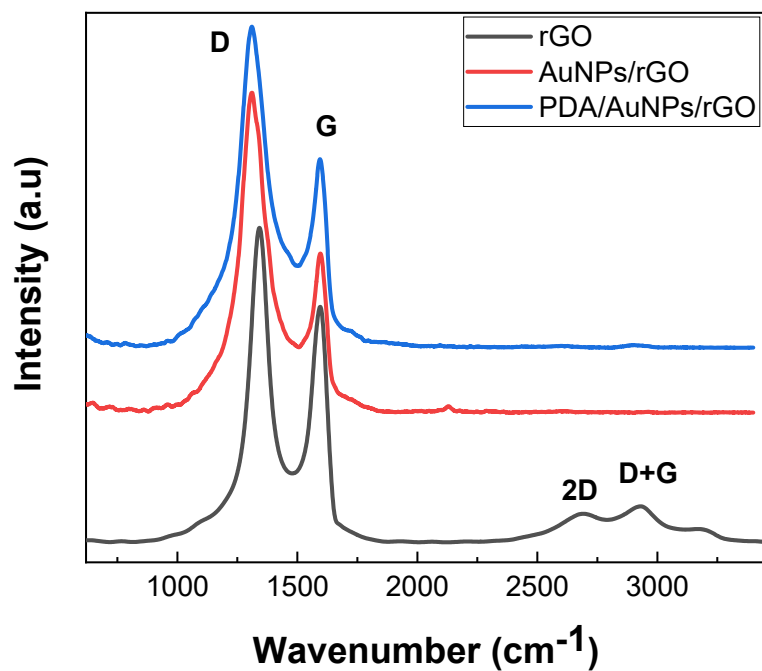

62

**Figure 4S.** Raman spectra of FTO electrodes modified with rGO, AuNPs/rGO, PDA/AuNPs/rGO

63

64

65

66

67

68

69

70

71

72

73

74

75

76

77

78

79

80

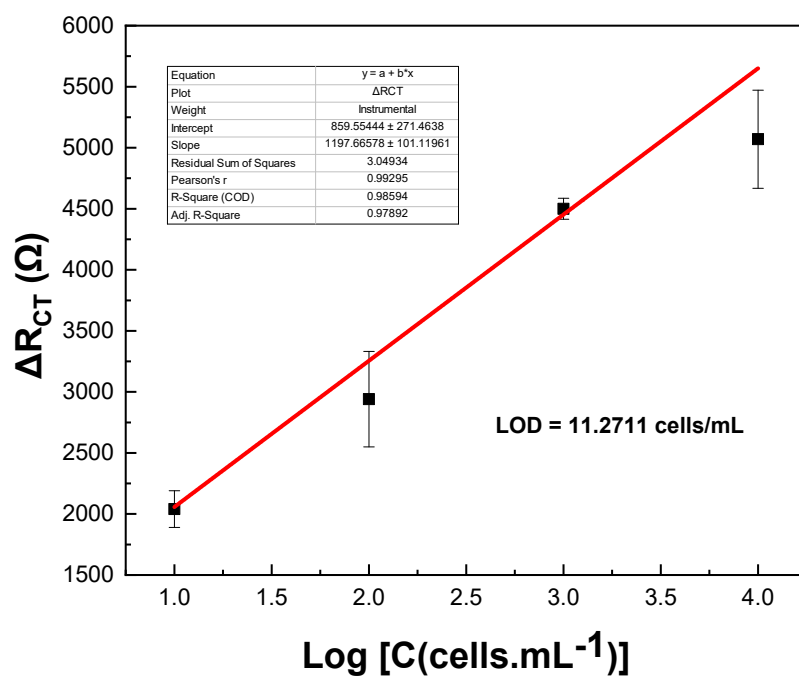

**Figure 5S.** Cell detection on PDA/FTO

81  
82  
83  
84  
85  
86  
87  
88  
89  
90  
91  
92  
93  
94  
95  
96  
97  
98  
99  
100

101

**Table 1S.** EDX analysis data

| Sample                | Element   | Weight%      | Atomic%     |
|-----------------------|-----------|--------------|-------------|
| PDA/AuNPs/rGO/<br>FTO | C         | 6.97         | 25.30       |
|                       | O         | 16.90        | 46.02       |
|                       | Si        | 2.34         | 3.63        |
|                       | Ca        | 1.12         | 1.21        |
|                       | Sn        | 53.17        | 19.52       |
|                       | <b>Au</b> | <b>19.50</b> | <b>4.31</b> |

102

103

104

**Table 2S.** Comparisation of cytosensing performances for circulating tumor cells.

| Electrode                             | Targeted cell               | Linear range<br>(cells.mL <sup>-1</sup> ) | Detection limit<br>(cells.mL <sup>-1</sup> ) | Ref  |
|---------------------------------------|-----------------------------|-------------------------------------------|----------------------------------------------|------|
| PGE/PDA                               | A-549<br>(lung cancer)      | 1E2 – 1E5                                 | 25                                           | (23) |
| AuE/Carbon black/AuNPs/anti-<br>EpCAM | A-549<br>(lung cancer)      | 5-1E6                                     | 1                                            | (43) |
| AuE/GO-AuNSs@rBSA-FA                  | MGC-803<br>(gastric cancer) | 3E2 – 7E6                                 | 100                                          | (26) |
| GCE/Bpene@PDA-SCX8-FA                 | LNCaP<br>(prostate cancer)  | 2E2-1E5                                   | 36                                           | (44) |
| AuE/MoS <sub>2</sub> /FA              | HeLa<br>(cervical cancer)   | 50-1E5                                    | 52                                           | (45) |

105

106

PGE: Pencil graphite electrode

107

AuNSs: gold nanostars

108

BSA: bovine serum albumin

109

FA: Folic acid

110
